# Supplementary material for: BOLD: Blood-gas and Oximetry Linked Dataset
Source: PubMed Central journal article supplement (PMC11126612; doi:10.1038/s41597-024-03225-z), 2024-05-24
Supplement: 41597_2024_3225_MOESM1_ESM.pdf [file 41597_2024_3225_MOESM1_ESM.pdf]

# Supplementary Information

|                                                                                                                                             |          |
|---------------------------------------------------------------------------------------------------------------------------------------------|----------|
| <b>Supplementary Information</b> .....                                                                                                      | <b>1</b> |
| Supplemental Figures.....                                                                                                                   | 2        |
| Supplemental Figure 1a. Completeness of the aligned covariates, among Asian patients.....                                                   | 2        |
| Supplemental Figure 1b. Completeness of the aligned covariates, among Black patients.....                                                   | 2        |
| Supplemental Figure 1c. Completeness of the aligned covariates, among Hispanic OR Latino patients.....                                      | 4        |
| Supplemental Figure 1d. Completeness of the aligned covariates, among White patients.....                                                   | 5        |
| Supplemental Tables.....                                                                                                                    | 6        |
| Supplemental Table 1. Mapping of MIMIC-III, MIMIC-IV, eICU-CRD static concepts..                                                            | 6        |
| Supplemental Table 2. Item IDs related to SaO2 and other laboratory test values, stratified by source database .....                        | 7        |
| Supplemental Table 3a. race and ethnicity unified mapping in MIMIC-IV.....                                                                  | 10       |
| Supplemental Table 3b. race and ethnicity unified mapping in MIMIC-III.....                                                                 | 11       |
| Supplemental Table 3b. race and ethnicity unified mapping in eICU-CRD.....                                                                  | 12       |
| Supplemental Table 4. Descriptive patient characteristics by race and ethnicity.....                                                        | 13       |
| Supplemental Table 5. Descriptive patient characteristics by hidden hypoxemia (SpO2 ≥ 88% but SaO2 < 88%, as defined by Wong et al.2 )..... | 15       |

## Supplemental Figures

Supplemental Figure 1a. Completeness of the aligned covariates, among Asian patients.

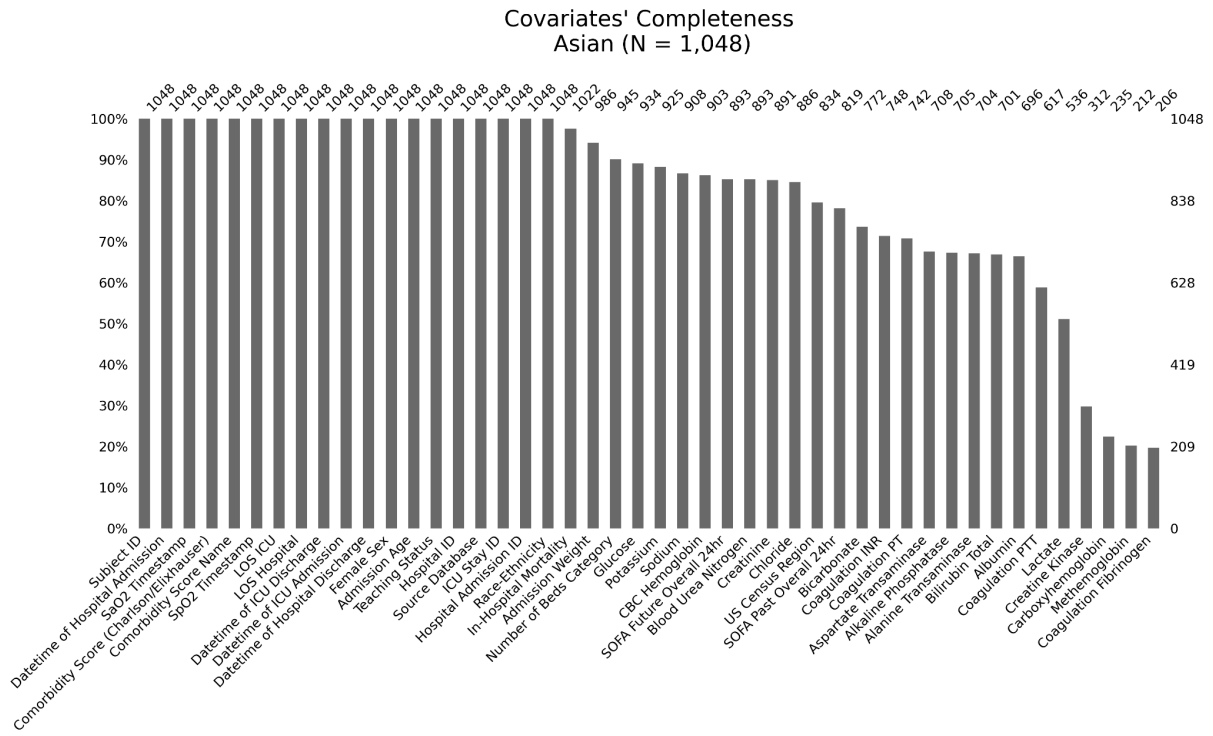

Supplemental Figure 1b. Completeness of the aligned covariates, among Black patients.

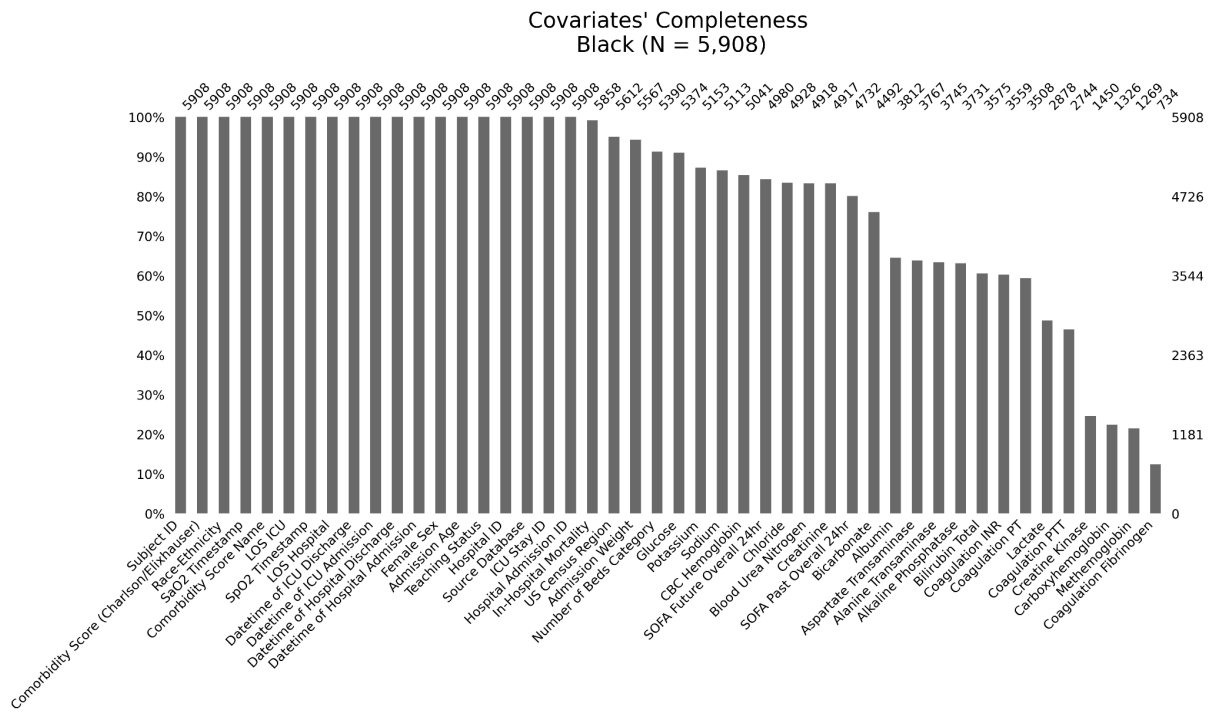

Supplemental Figure 1c. Completeness of the aligned covariates, among Hispanic OR Latino patients.

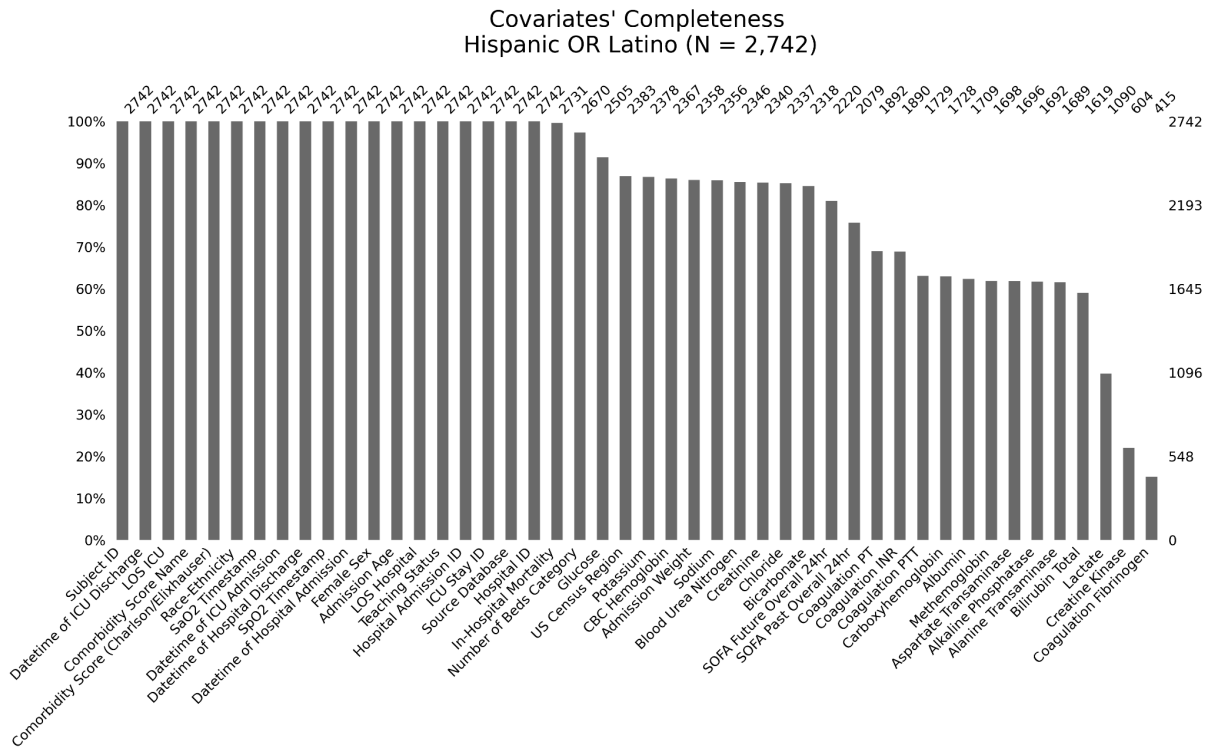

Supplemental Figure 1d. Completeness of the aligned covariates, among White patients.

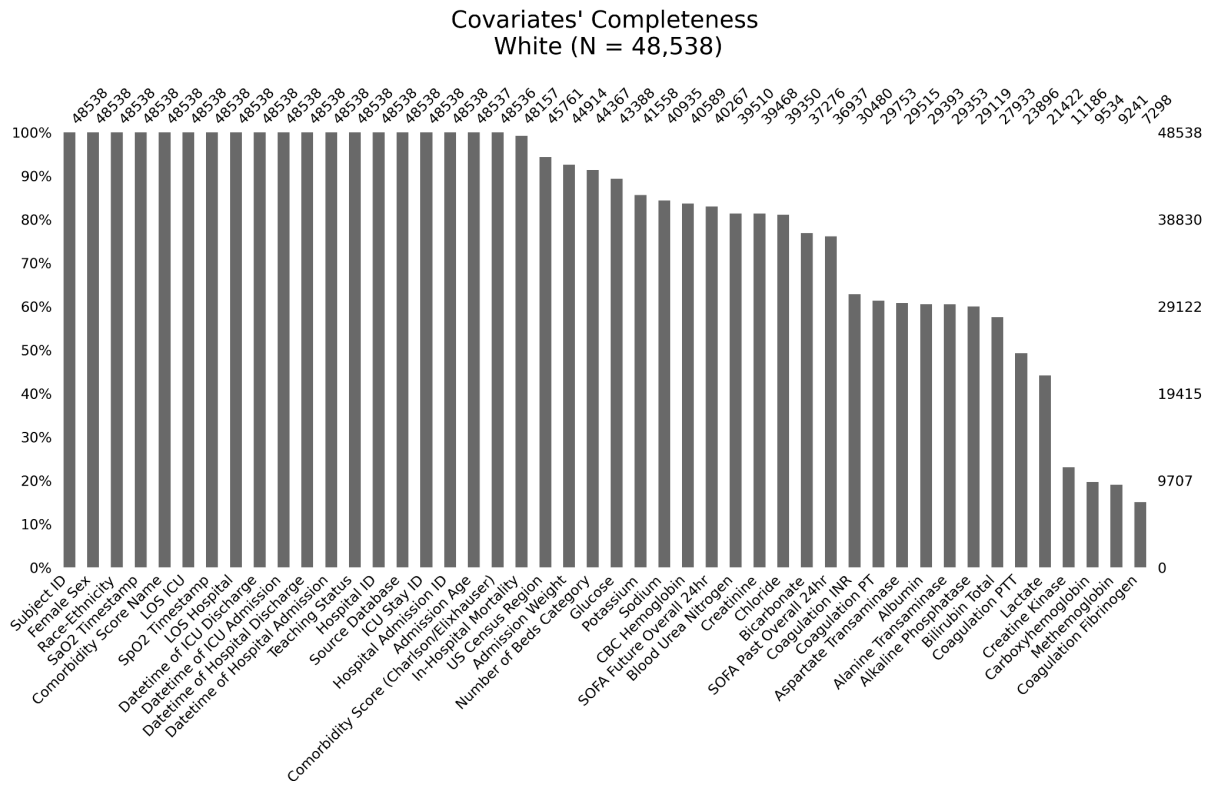

## Supplemental Tables

Supplemental Table 1. Mapping of MIMIC-III, MIMIC-IV, eICU-CRD static concepts.

| Unified Concept                    | MIMIC-III                                                           | MIMIC-IV             | eICU-CRD                                             |
|------------------------------------|---------------------------------------------------------------------|----------------------|------------------------------------------------------|
| <i>subject_id</i>                  | SUBJECT_ID                                                          | subject_id           | uniquepid                                            |
| <i>hospital_admission_id</i>       | HADM_ID                                                             | hadm_id              | patienthealthsystemstayid                            |
| <i>icustay_id</i>                  | ICUSTAY_ID                                                          | stay_id              | patientunitstayid                                    |
| <i>source_db</i>                   | mimic_iii                                                           | mimic_iv             | eicu                                                 |
| <i>hospitalid</i>                  | 9999                                                                | 9999                 | hospitalid                                           |
| <i>numbedscategory</i>             | ≥ 500                                                               | ≥ 500                | numbedscategory                                      |
| <i>teachingstatus</i>              | TRUE                                                                | TRUE                 | teachingstatus                                       |
| <i>region</i>                      | Northeast                                                           | Northeast            | region                                               |
| <i>age (at admission)</i>          | > 90 = 90                                                           | > 90 = 90            | > 89 = 90                                            |
| <i>sex_female</i>                  | gender                                                              | gender               | gender                                               |
| <i>weight_admission</i>            | weight_first                                                        | first_day_weight     | admissionweight                                      |
| <i>height_admission</i>            | height_first                                                        | first_day_height     | admissionheight                                      |
| <i>BMI_admission</i>               | $\text{weight\_admission} / ((\text{height\_admission} / 100) ^ 2)$ |                      |                                                      |
| <i>datetime_hospital_admit</i>     | admittime                                                           | admittime            | 1 Jan 2014                                           |
| <i>datetime_hospital_discharge</i> | disctime                                                            | disctime             | 1 Jan 2014 +<br>hospitaldischargeoffset              |
| <i>datetime_icu_admit</i>          | intime                                                              | icu_intime           | unitadmitoffset                                      |
| <i>datetime_icu_discharge</i>      | outtime                                                             | icu_outtime          | unitdischargeoffset                                  |
| <i>los_hospital</i>                | los_hospital                                                        | los_hospital         | hospitaldischargeoffset -<br>hospitaladmissionoffset |
| <i>los_ICU</i>                     | los_icu                                                             | los_icu              | icu_los_hours / 24                                   |
| <i>comorbidity_score_name</i>      | Elixhauser                                                          | Charlson             | Charlson                                             |
| <i>in_hospital_mortality</i>       | hospital_expire_flag                                                | hospital_expire_flag | hosp_mort                                            |

Supplemental Table 2. Item IDs related to SaO<sub>2</sub> and other laboratory test values, stratified by source database .

| Type of Variable   | Measurement       | Left-side time window | itemid                     |                | label                     |
|--------------------|-------------------|-----------------------|----------------------------|----------------|---------------------------|
|                    |                   |                       | MIMIC-III                  | MIMIC-IV       | eICU-CRD                  |
| Arterial Blood Gas | SaO <sub>2</sub>  | 0                     | 50817                      | 50817          | O2 Sat (%)                |
|                    | paO <sub>2</sub>  | 0                     | 50821                      | 50821          | paO2                      |
|                    | paCO <sub>2</sub> | 0                     | 50818                      | 50818          | paCO2                     |
|                    | pH                | 0                     | 50820, 50831, 51094, 51491 | 50820          | pH                        |
|                    | Methemoglobin     | 0                     | 50814                      | 50814          | Methemoglobin             |
|                    | Carboxyhemoglobin | 0                     | 50805                      | 50805          | Carboxyhemoglobin         |
|                    | Vital Signs       | SpO <sub>2</sub>      | 5min                       | 646, 220277    | 220277                    |
| Heart Rate         |                   | 4h                    | 211, 220045                | 220045         | Heart Rate                |
| Respiratory Rate   |                   | 4h                    | 615, 618, 220210, 224690   | 220210, 224690 | Respiratory Rate          |
| mbp_ni             |                   | 4h                    | 456, 443, 220181           | 220181         | Non-Invasive BP Mean      |
| sbp_ni             |                   | 4h                    | 442, 455, 220179           | 220179         | Non-Invasive BP Systolic  |
| dbp_ni             |                   | 4h                    | 8440, 8441, 220180         | 220180         | Non-Invasive BP Diastolic |
| mbp_i              |                   | 4h                    | 52, 6702, 220052, 225312   | 220052, 225312 | Invasive BP Mean          |
| sbp_i              |                   | 4h                    | 51, 6701, 220050           | 220050, 225309 | Invasive BP Systolic      |
| dbp_i              |                   | 4h                    | 8368, 8555, 220051         | 220051, 225310 | Invasive BP Diastolic     |
| temperature        |                   | 8h                    | 223762, 676, 223761, 678   | 223761, 223762 | Temperature (C)           |
| Complete Blood     | hemoglobin        | 24h                   | 50811                      | 51222          | Hgb                       |

|                               |             |        |       |       |                          |
|-------------------------------|-------------|--------|-------|-------|--------------------------|
| <b>Count</b>                  |             |        |       |       |                          |
|                               | hematocrit  | 24h    | 50810 | 51221 | Hct                      |
|                               | mch         | 24h    | 51248 | 51248 | MCH                      |
|                               | mchc        | 24h    | 51249 | 51249 | MCHC                     |
|                               | mcv         | 24h    | 51250 | 51250 | MCV                      |
|                               | platelet    | 24h    | 51265 | 51265 | platelets x 1000         |
|                               | rbc         | 24h    | 51279 | 51279 | RBC                      |
|                               | rdw         | 24h    | 51277 | 51277 | RDW                      |
|                               | wbc         | 24h    | 51300 | 51301 | WBC x 1000               |
| <b>Coagulation</b>            | fibrinogen  | 7 days | 51214 | 51214 | fibrinogen               |
|                               | inr         | 7 days | 51237 | 51237 | PT - INR                 |
|                               | pt          | 7 days | 51274 | 51274 | PT                       |
|                               | ptt         | 7 days | 51275 | 51275 | PTT                      |
| <b>Basic Metabolic Panel</b>  |             |        |       |       |                          |
|                               | sodium      | 24h    | 50983 | 50983 | sodium                   |
|                               | potassium   | 24h    | 50971 | 50971 | potassium                |
|                               | chloride    | 24h    | 50806 | 50902 | chloride                 |
|                               | bicarbonate | 24h    | 50803 | 50882 | bicarbonate              |
|                               | bun         | 24h    | 51006 | 51006 | BUN                      |
|                               | creatinine  | 24h    | 50912 | 50912 | creatinine               |
|                               | glucose     | 24h    | 50809 | 50931 | bedside glucose, glucose |
|                               | aniongap    | 24h    | 50868 | 50868 | aniongap                 |
|                               | calcium     | 24h    | 50808 | 50893 | calcium                  |
|                               | lactate     | 24h    | 50813 | 50813 | lactate                  |
| <b>Hepatic Function Panel</b> |             |        |       |       |                          |
|                               | alt         | 7 days | 50861 | 50861 | ALT (SGPT)               |
|                               | alp         | 7 days | 50863 | 50863 | anion gap                |



**Supplement: BOLD: Blood-gas and Oximetry Linked Dataset**

|               |                  |        |       |       |                  |
|---------------|------------------|--------|-------|-------|------------------|
|               | ast              | 7 days | 50878 | 50878 | AST (SGOT)       |
|               | bilirubin_total  | 7 days | 50885 | 50885 | total bilirubin  |
|               | bilirubin_direct | 7 days | 50883 | 50883 | direct bilirubin |
|               | albumin          | 7 days | 50862 | 50862 | albumin          |
| <b>Enzyme</b> | ck_cpk           | 7 days | 50910 | 50910 | CPK              |
|               | ck_mb            | 7 days | 50911 | 50911 | CPK-MB           |
|               | ld_ldh           | 7 days | 50954 | 50954 | LDH              |

Supplemental Table 3a. race and ethnicity unified mapping in MIMIC-IV.

| Original Labels in MIMIC-IV               | N     | Unified Mapping                    |
|-------------------------------------------|-------|------------------------------------|
| AMERICAN INDIAN/ALASKA NATIVE             | 140   | American Indian / Alaska Native    |
| ASIAN                                     | 840   | Asian                              |
| ASIAN - ASIAN INDIAN                      | 179   | Asian                              |
| ASIAN - CHINESE                           | 792   | Asian                              |
| ASIAN - KOREAN                            | 51    | Asian                              |
| ASIAN - SOUTH EAST ASIAN                  | 293   | Asian                              |
| BLACK/AFRICAN                             | 309   | Black                              |
| BLACK/AFRICAN AMERICAN                    | 6723  | Black                              |
| BLACK/CAPE VERDEAN                        | 502   | Black                              |
| BLACK/CARIBBEAN ISLAND                    | 426   | Black                              |
| HISPANIC OR LATINO                        | 724   | Hispanic OR Latino                 |
| HISPANIC/LATINO - CENTRAL AMERICAN        | 47    | Hispanic OR Latino                 |
| HISPANIC/LATINO - COLUMBIAN               | 60    | Hispanic OR Latino                 |
| HISPANIC/LATINO - CUBAN                   | 72    | Hispanic OR Latino                 |
| HISPANIC/LATINO - DOMINICAN               | 535   | Hispanic OR Latino                 |
| HISPANIC/LATINO - GUATEMALAN              | 168   | Hispanic OR Latino                 |
| HISPANIC/LATINO - HONDURAN                | 61    | Hispanic OR Latino                 |
| HISPANIC/LATINO - MEXICAN                 | 68    | Hispanic OR Latino                 |
| HISPANIC/LATINO - PUERTO RICAN            | 902   | Hispanic OR Latino                 |
| HISPANIC/LATINO - SALVADORAN              | 104   | Hispanic OR Latino                 |
| MULTIPLE RACE/ETHNICITY                   | 68    | More Than One Race                 |
| NATIVE HAWAIIAN OR OTHER PACIFIC ISLANDER | 110   | Native Hawaiian / Pacific Islander |
| OTHER                                     | 2368  | Unknown                            |
| PATIENT DECLINED TO ANSWER                | 425   | Unknown                            |
| PORTUGUESE                                | 322   | White                              |
| SOUTH AMERICAN                            | 64    | Hispanic OR Latino                 |
| UNABLE TO OBTAIN                          | 844   | Unknown                            |
| UNKNOWN                                   | 6415  | Unknown                            |
| WHITE                                     | 47197 | White                              |
| WHITE - BRAZILIAN                         | 147   | White                              |
| WHITE - EASTERN EUROPEAN                  | 164   | White                              |
| WHITE - OTHER EUROPEAN                    | 1307  | White                              |

|                 |     |       |
|-----------------|-----|-------|
| WHITE - RUSSIAN | 754 | White |
|-----------------|-----|-------|

Supplemental Table 3b. race and ethnicity unified mapping in MIMIC-III.

| Original Labels in MIMIC-III                             | N    | Unified Mapping                 |
|----------------------------------------------------------|------|---------------------------------|
| AMERICAN INDIAN/ALASKA NATIVE                            | 54   | American Indian / Alaska Native |
| AMERICAN INDIAN/ALASKA NATIVE FEDERALLY RECOGNIZED TRIBE | 3    | American Indian / Alaska Native |
| ASIAN                                                    | 1510 | Asian                           |
| ASIAN - ASIAN INDIAN                                     | 93   | Asian                           |
| ASIAN - CAMBODIAN                                        | 22   | Asian                           |
| ASIAN - CHINESE                                          | 278  | Asian                           |
| ASIAN - FILIPINO                                         | 27   | Asian                           |
| ASIAN - JAPANESE                                         | 7    | Asian                           |
| ASIAN - KOREAN                                           | 12   | Asian                           |
| ASIAN - OTHER                                            | 18   | Asian                           |
| ASIAN - THAI                                             | 4    | Asian                           |
| ASIAN - VIETNAMESE                                       | 53   | Asian                           |
| BLACK/AFRICAN                                            | 44   | Black                           |
| BLACK/AFRICAN AMERICAN                                   | 5591 | Black                           |
| BLACK/CAPE VERDEAN                                       | 206  | Black                           |
| BLACK/HAITIAN                                            | 105  | Black                           |
| CARIBBEAN ISLAND                                         | 9    | Hispanic OR Latino              |
| HISPANIC OR LATINO                                       | 1742 | Hispanic OR Latino              |
| HISPANIC/LATINO - CENTRAL AMERICAN (OTHER)               | 13   | Hispanic OR Latino              |
| HISPANIC/LATINO - COLOMBIAN                              | 10   | Hispanic OR Latino              |
| HISPANIC/LATINO - CUBAN                                  | 24   | Hispanic OR Latino              |
| HISPANIC/LATINO - DOMINICAN                              | 83   | Hispanic OR Latino              |
| HISPANIC/LATINO - GUATEMALAN                             | 39   | Hispanic OR Latino              |
| HISPANIC/LATINO - HONDURAN                               | 4    | Hispanic OR Latino              |
| HISPANIC/LATINO - MEXICAN                                | 12   | Hispanic OR Latino              |
| HISPANIC/LATINO - PUERTO RICAN                           | 237  | Hispanic OR Latino              |
| HISPANIC/LATINO - SALVADORAN                             | 18   | Hispanic OR Latino              |
| MIDDLE EASTERN                                           | 44   | White                           |
| MULTI RACE ETHNICITY                                     | 137  | More Than One Race              |

|                                           |       |                                    |
|-------------------------------------------|-------|------------------------------------|
| NATIVE HAWAIIAN OR OTHER PACIFIC ISLANDER | 18    | Native Hawaiian / Pacific Islander |
| OTHER                                     | 1549  | Unknown                            |
| PATIENT DECLINED TO ANSWER                | 567   | Unknown                            |
| PORTUGUESE                                | 70    | White                              |
| SOUTH AMERICAN                            | 9     | Hispanic OR Latino                 |
| UNABLE TO OBTAIN                          | 882   | Unknown                            |
| UNKNOWN/NOT SPECIFIED                     | 4724  | Unknown                            |
| WHITE                                     | 42488 | White                              |
| WHITE - BRAZILIAN                         | 64    | White                              |
| WHITE - EASTERN EUROPEAN                  | 28    | White                              |
| WHITE - OTHER EUROPEAN                    | 85    | White                              |
| WHITE - RUSSIAN                           | 168   | White                              |

Supplemental Table 3b. race and ethnicity unified mapping in eICU-CRD.

| eICU-CRD         | N       | Unified Mapping                 |
|------------------|---------|---------------------------------|
| –                | 2,290   | Unknown                         |
| African American | 21,308  | Black                           |
| Asian            | 3,270   | Asian                           |
| Caucasian        | 155,285 | White                           |
| Hispanic         | 7,464   | Hispanic OR Latino              |
| Native American  | 1,700   | American Indian / Alaska Native |
| Other/Unknown    | 9,542   | Unknown                         |

Supplemental Table 4. Descriptive patient characteristics by race and ethnicity.

|                                              |              | Asian            | Black            | Hispanic OR Latino | White            |
|----------------------------------------------|--------------|------------------|------------------|--------------------|------------------|
| <b>N</b>                                     | <b>Class</b> | 858              | 4785             | 2116               | 37,380           |
| <b>Covariates</b>                            |              |                  |                  |                    |                  |
| Database                                     | eICU-CRD     | 723 (84.3)       | 4405 (92.1)      | 1934 (91.4)        | 33,357 (89.2)    |
|                                              | MIMIC-III    | 16 (1.9)         | 42 (0.9)         | 20 (0.9)           | 590 (1.6)        |
|                                              | MIMIC-IV     | 119 (13.9)       | 338 (7.1)        | 162 (7.7)          | 3,433 (9.2)      |
| Age (admission), median [Q1,Q3]              |              | 67.0 [55.0,77.0] | 61.0 [50.0,71.0] | 67.0 [53.0,78.0]   | 67.0 [57.0,77.0] |
| Sex,N (%)                                    | Female       | 357 (41.6)       | 2290 (47.9)      | 965 (45.6)         | 16,217 (43.4)    |
| BMI (Admission), median [Q1,Q3]              |              | 24.6 [21.8,28.4] | 28.5 [23.8,35.0] | 27.3 [23.7,32.1]   | 28.2 [23.9,33.6] |
| Charlson Comorbidity Index, median [Q1,Q3]   |              | 4.0 [2.0,6.0]    | 4.0 [2.0,6.0]    | 4.0 [2.0,6.0]      | 4.0 [2.0,6.0]    |
| Elixhauser Comorbidity Index, median [Q1,Q3] |              | 12.0 [6.0,19.2]  | 13.0 [6.2,18.0]  | 7.0 [5.0,11.2]     | 8.0 [3.0,16.0]   |
| SOFA past 24h, median [Q1,Q3]                |              | 4.0 [2.0,6.0]    | 4.0 [2.0,7.0]    | 5.0 [2.0,7.0]      | 4.0 [2.0,7.0]    |
| Hospital Region, N (%)                       | Midwest      | 115 (17.3)       | 1205 (26.4)      | 148 (8.1)          | 11,646 (32.9)    |
|                                              | Northeast    | 169 (25.4)       | 487 (10.7)       | 230 (12.6)         | 7,073 (20.0)     |

|                                           |       |               |               |               |               |
|-------------------------------------------|-------|---------------|---------------|---------------|---------------|
|                                           | South | 166 (25.0)    | 2469 (54.1)   | 1044 (57.4)   | 9,432 (26.7)  |
|                                           | West  | 215 (32.3)    | 404 (8.8)     | 397 (21.8)    | 7,199 (20.4)  |
| <b>Outcomes</b>                           |       |               |               |               |               |
| Hidden Hypoxemia, N (%)                   |       | 22 (2.6)      | 216 (4.5)     | 70 (3.3)      | 1,314 (3.5)   |
| ICU LoS if dead, median [Q1,Q3], days     |       | 4.7 [2.0,9.7] | 4.2 [1.8,9.3] | 3.5 [1.5,7.3] | 3.4 [1.5,7.2] |
| ICU LoS if survived, median [Q1,Q3], days |       | 3.2 [1.7,6.2] | 3.3 [1.8,6.5] | 2.8 [1.5,5.3] | 3.0 [1.7,5.8] |
| In-Hospital Mortality, N (%)              |       | 686 (82.0)    | 3926 (82.7)   | 1712 (81.3)   | 6,484 (17.5)  |

Legend: LoS, length of stay

Supplemental Table 5. Descriptive patient characteristics by hidden hypoxemia ( $\text{SpO}_2 \geq 88\%$  but  $\text{SaO}_2 < 88\%$ , as defined by Wong et al.<sup>2</sup> ).

|                                            |                                    | Hidden Hypoxemia absent | Hidden Hypoxemia present |
|--------------------------------------------|------------------------------------|-------------------------|--------------------------|
| <b>N</b>                                   | <b>Class</b>                       | 47,362                  | 1,731                    |
| <b>Covariates</b>                          |                                    |                         |                          |
| Database                                   | eICU-CRD                           | 41,752 (88.2)           | 1,686 (97.4)             |
|                                            | MIMIC-III                          | 722 (1.5)               | 18 (1.0)                 |
|                                            | MIMIC-IV                           | 4,888 (10.3)            | 27 (1.6)                 |
| Age (admission), median [Q1,Q3]            |                                    | 66.0 [55.0,76.0]        | 65.0 [54.0,75.0]         |
| Race and Ethnicity, N (%)                  | American Indian / Alaska Native    | 371 (0.8)               | 9 (0.5)                  |
|                                            | Asian                              | 836 (1.8)               | 22 (1.3)                 |
|                                            | Black                              | 4,569 (9.6)             | 216 (12.5)               |
|                                            | Hispanic OR Latino                 | 2,046 (4.3)             | 70 (4.0)                 |
|                                            | Unknown                            | 3,462 (7.3)             | 100 (5.8)                |
|                                            | White                              | 36,066 (76.1)           | 1,314 (75.9)             |
|                                            | More Than One Race                 | 3 (0.0)                 |                          |
|                                            | Native Hawaiian / Pacific Islander | 9 (0.0)                 |                          |
| Sex, N (%)                                 | Female                             | 20,634 (43.6)           | 799 (46.2)               |
| BMI (Admission), median [Q1,Q3]            |                                    | 28.1 [23.8,33.5]        | 28.2 [23.8,35.6]         |
| Charlson Comorbidity Index, median [Q1,Q3] |                                    | 4.0 [2.0,6.0]           | 4.0 [2.0,6.0]            |

|                                              |           |                |                 |
|----------------------------------------------|-----------|----------------|-----------------|
| Elixhauser Comorbidity Index, median [Q1,Q3] |           | 9.0 [3.0,16.0] | 14.0 [7.2,18.5] |
| SOFA over past 24 hours, median [Q1,Q3]      |           | 4.0 [2.0,7.0]  | 4.0 [2.0,7.0]   |
| Hospital Region, N (%)                       | Midwest   | 13,334 (30.0)  | 645 (39.0)      |
|                                              | Northeast | 8,802 (19.8)   | 250 (15.1)      |
|                                              | South     | 13,564 (30.5)  | 454 (27.4)      |
|                                              | West      | 8,764 (19.7)   | 305 (18.4)      |
| <b>Outcomes</b>                              |           |                |                 |
| ICU LoS if dead, median [Q1,Q3], days        |           | 3.6 [1.6,7.7]  | 2.6 [1.0,5.9]   |
| LoS ICU if survived, median [Q1,Q3], days    |           | 3.0 [1.7,5.9]  | 3.6 [1.9,7.0]   |
| In-Hospital Mortality, N (%)                 |           | 8,092 (17.2)   | 450 (26.1)      |
